# Supplementary material
Source: Springer Nature journal article supplement (https://www.springermedizin.de/resource/supplementary/12906_2008_215_MOESM5_ESM.pdf/9524294)

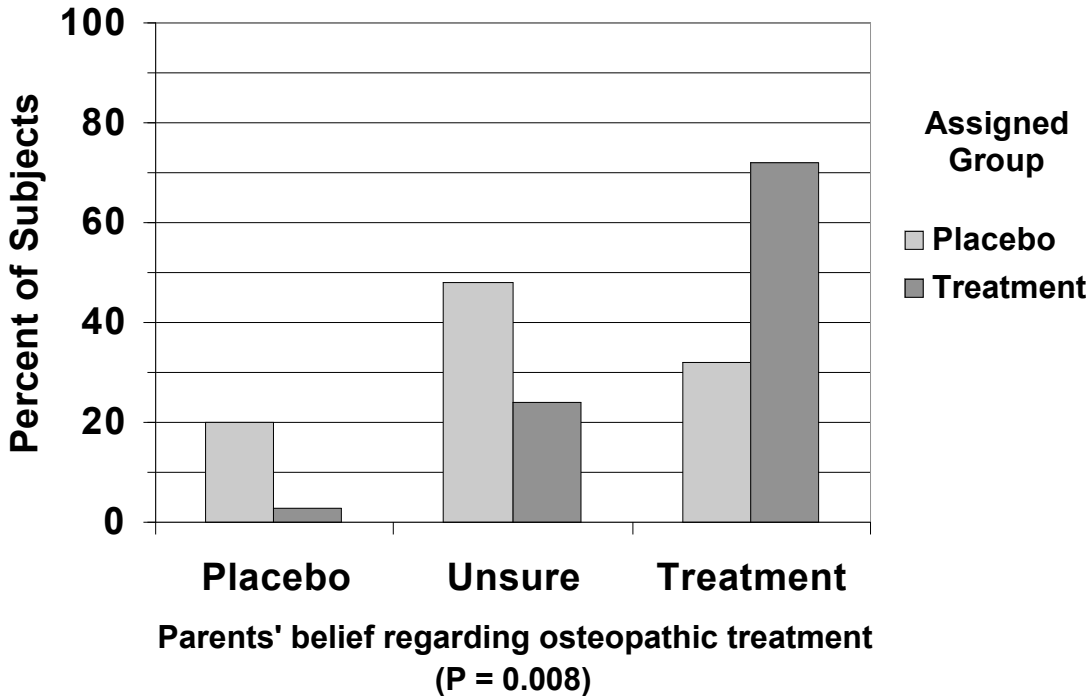

Supplement: MOESM5 [file 9524294]
